# Supplementary material for: Mucosal host-microbe interactions associate with clinical phenotypes in inflammatory bowel disease
Source: PubMed Central journal article supplement (PMC10874382; doi:10.1038/s41467-024-45855-2), 2024-02-17
Supplement: 41467_2024_45855_MOESM1_ESM.pdf [file 41467_2024_45855_MOESM1_ESM.pdf]

# Supplemental Information

1  
2  
3  
4  
5  
6  
7  
8  
9  
10  
11  
12  
13  
14  
15  
16  
17  
18  
19  
20  
21  
22  
23  
24  
25

## **Supplemental Materials and Methods**

### **Supplemental Results**

**Supplementary Fig. S1.**

**Supplementary Fig. S2.**

**Supplementary Fig. S3.**

**Supplementary Fig. S4.**

**Supplementary Fig. S5.**

**Supplementary Fig. S6.**

**Supplementary Fig. S7.**

**Supplementary Fig. S8.**

### **Supplemental References**

## 26 **Supplemental Materials and Methods**

27

### 28 **Clinical data**

29 Detailed phenotypic data were collected for all patients, including age, sex, BMI (body weight  
30 divided by squared height), smoking status, Montreal disease classification, medication usage,  
31 history of surgery, clinical disease activity and histological disease activity, and all were assessed  
32 at time of sampling. Medical treatment was noted irrespective of prescribed dosages, intervals or  
33 phase of treatment. Montreal disease classification was recorded from the closest visit to the  
34 outpatient clinic at time of sampling. Clinical disease activity was established using the Harvey-  
35 Bradshaw Index (HBI) for patients with CD and the Simple Clinical Colitis Activity Index (SCCAI)  
36 for patients with UC.

37

### 38 **RNA isolation and RNA-seq data processing**

39 RNA isolation was performed using the AllPrep DNA/RNA mini kit (Qiagen, reference number:  
40 80204) according to manufacturer's instructions. Homogenization of intestinal biopsies was  
41 performed in RLT lysis buffer including  $\beta$ -mercaptoethanol using the Qiagen Tissue Lyser with  
42 stainless steel beads (diameter 5 mm, reference number: 69989). For the first sample batch,  
43 sample preparation was executed using the BioScientific NEXTflex™ Rapid Directional RNA-Seq  
44 Kit (Perkin-Elmer). Paired-end sequencing of RNA was performed using the Illumina NextSeq500  
45 sequencer (Illumina). For the second sample batch, sample preparation was performed for  
46 construction of the Eukaryotic Transcriptome Library (Novogene). Paired-end sequencing of RNA  
47 was performed using the Illumina HiSeq PE250 platform. Sequencing was performed in two  
48 different batches, which necessitated pseudo-randomization (covering type of IBD diagnosis,  
49 biopsy location and disease activity) across plates to mitigate potential batch effects. The batch  
50 effects have been taken into account in all the analysis. On average, approximately 25 million  
51 reads were generated per sample.

52 Raw read quality was checked using FastQC with default parameters (ref v.0.11.7). Adaptors  
53 identified by FastQC were clipped using Cutadapt (ref v1.1) with default settings. Sickle (ref  
54 v1.200) was used to trim low-quality ends from the reads (length <25 nucleotides, quality <20).  
55 Reads were aligned to the human genome (human\_glk\_v37) using HISAT (ref v0.1.6) (with  
56 maximum allowance of two mismatches), and read sorting was performed using SAMtools (ref

57 v0.1.19). SAMtools flagstat and Picard tools (ref v2.9.0) were used to obtain mapping statistics.  
58 Six samples with low percentage read alignment (< 90%) were removed. Gene expression was  
59 estimated using HTSeq (ref v0.9.1), based on Ensemble version 75 annotation, resulting in a RNA  
60 expression dataset featuring 15,934 genes. Expression data on gene level were normalized using  
61 a trimmed mean of *M* values, and *clr* transformation was applied, resulting in 826 mucosal RNA-  
62 seq samples.

63

#### 64 **16S rRNA gene sequencing**

65 Microbial composition of intestinal biopsies was determined by Illumina MiSeq paired-end  
66 sequencing of the V3-V4 hypervariable region of the 16S rRNA gene (MiSeq Benchtop  
67 Sequencer, Illumina Inc., San Diego, USA). Amplification of bacterial DNA was performed by PCR  
68 using modified 341F and 806R primers with a six-nucleotide barcode on the 806R primer for  
69 multiplexing. Sequences of both primers can be found in **Table S1**. Both primers contain an  
70 Illumina MiSeq adapter sequence, which is necessary for flow cell-binding in the MiSeq machine.  
71 Read trimming and filtering was done using *Trimmomatic* (0.33) to obtain an average read quality  
72 of 25 and a minimum length of 50. Quality was further checked using R package *DADA2* (v1.03)  
73 with the following parameters: minLen = 160, maxN=0, maxEE=c(2,2), truncQ=2 and  
74 rm.phix=TRUE. After error correction and chimera removal, the amplicon sequence variants were  
75 assigned to the *silva* database (v.132). Samples were rarefied at 2,000 mapped reads and those  
76 higher than this threshold were used for downstream analysis, resulting in 755 mucosal 16S  
77 samples. We further removed bacteria with low-abundance rate at 1% and low-present rate 10%,  
78 and kept 131 taxa for analysis. After accounting for overlap between mucosal RNA-seq and  
79 mucosal 16S data, 697 intestinal biopsies from 335 different patients and 16 non-IBD controls  
80 were available for host-microbiota interaction analyses. There was no significant effect of sample  
81 storage time on neither mucosal 16S nor bulk RNA-sequencing quality (**Fig. S8**).

82

#### 83 **Polymerase chain reaction (PCR), DNA clean-up, and MiSeq library preparation for** 84 **mucosal 16 microbiota characterization**

85 The PCR procedure consisted of the following conditions: an initial cycle of 94°C for 3 min followed  
86 by 32 cycles of 94°C for 45 sec, 50°C for 60 sec and 72°C for 90 sec, with a final extension of  
87 72°C for 10 min. Agarose gel electrophoresis confirmed the presence of the PCR product (band

88 at ~465 bp) in successfully amplified samples. Subsequently, DNA samples were thoroughly  
89 cleaned by mixing the remainder of the PCR product with 25  $\mu$ L Agencourt AMPure XP beads  
90 (Beckman Coulter, Brea, California, USA) followed by an incubation of 5 min at room temperature.  
91 Beads were separated from the mixture by placing the samples within a magnetic bead separator  
92 for 2 min. After discarding the cleared solution, beads were washed twice by resuspending them  
93 in 200  $\mu$ L fresh 80% ethanol, followed by an incubation of 30 sec in the magnetic bead separator,  
94 and again discarding the cleared solution. The pellet was dried for 15 min and resuspended in  
95 52.5  $\mu$ L 10 mM Tris HCl buffer (pH 8.5). Fifty (50)  $\mu$ L of this solution was subsequently brought  
96 into a new tube. DNA concentrations were measured using a Qubit<sup>®</sup> 2.0 fluorometer (Thermo-  
97 Fisher Scientific, Waltham, Massachusetts, USA). To ensure similar library representations  
98 across samples, 2 nM dilutions of each sample were prepared accordingly. A library was created  
99 by pooling 5  $\mu$ L of each diluted sample. Subsequently, 10  $\mu$ L of the sample pool and 10  $\mu$ L 0.2 M  
100 NaOH were mixed and incubated for 5 min to allow denaturation of the sample DNA. 980  $\mu$ L of  
101 the HT1 buffer of the MiSeq 2x300 cartridge was then added to this mixture. Next, a denatured  
102 diluted PhiX solution was created by combining 2  $\mu$ L 10 nM PhiX library with 3  $\mu$ L 10 mM Tris HCl  
103 buffer (pH 8.5) with 0.1% Tween-20. 5  $\mu$ L 0.2 M NaOH was added to this mixture and incubated  
104 for 5 min at room temperature. This 10  $\mu$ L mixture was eventually mixed with 990  $\mu$ L HT1 buffer.  
105 From the diluted sample pool, 150  $\mu$ L was combined with 50  $\mu$ L of the diluted PhiX solution, which  
106 was further diluted by the addition of 800  $\mu$ L HT1 buffer. Finally, 600  $\mu$ L of the prepared library  
107 solution was loaded into the sample loading reservoir of the 2x300 MiSeq cartridge for 16S rRNA  
108 amplicons sequencing (MiSeq Benchtop Sequencer, Illumina, San Diego, California, USA).  
109 Samples with low DNA concentrations after clean-up (quality score < 0.9) were discarded by  
110 PANDAseq to increase quality of sequence read-outs.

111

## 112 **Mucosal gene expression analysis and microbial characterization – statistical analysis**

113 To assess the effect of mucosal inflammation on gene expression, we re-coded the inflammation  
114 status in an ordinal fashion as 0, 1 or 2 to represent biopsies from non-IBD controls, biopsies from  
115 non-inflamed tissue of patients with IBD and biopsies from inflamed areas of patients with IBD,  
116 respectively. Intestinal inflammatory status was thus treated as a continuous variable to account  
117 for presence of residual inflammation in biopsies marked as being taken from non-inflamed areas  
118 in the intestines. A correction for all multiple tests from three groups was applied using an BH-  
119 adjusted *P* threshold of 0.05.

120 1) Inflammation-associated genes were identified in three comparisons: (1) CD  
121 colonic inflamed tissue vs. CD colonic non-inflamed tissue vs. non-IBD colonic tissue, (2)  
122 CD ileocecal inflamed tissue vs. CD ileocecal non-inflamed tissue vs. non-IBD ileocecal  
123 tissue and (3) UC colonic inflamed tissue vs. UC colonic non-inflamed tissue vs. non-IBD  
124 colonic tissue:

125  $Gene \sim intercept + inflammation + age + sex + BMI + medication + batch + (1|ID)$

126 2) Clinical phenotype-associated genes were identified using the following model:

127  $Gene \sim intercept + Montreal/anti-TNF\ therapy + age + sex + BMI + inflammation + tissue$   
128  $location + medication + batch + (1|ID)$

129

### 130 *Microbial characterization*

131 Associations between microbial features and biopsy inflammatory status, IBD diagnosis, disease  
132 location (biopsy origin) and clinical phenotypes were performed using general linear models (see  
133 below). Per sample, the mucosal dysbiosis score was defined as the median Aitchison distance  
134 from that sample to a reference sample set of non-IBD controls. Dysbiotic status was defined as  
135 being at the 90<sup>th</sup> percentile of this score [8].

136 1) Associations between microbial taxa and biopsy inflammation/location:

137  $Taxa \sim intercept + inflammation + location + age + sex + BMI + medication + batch +$   
138  $surgical\ resection + (1|ID)$

139 2) Associations between microbial taxa and clinical phenotypes:

140  $Taxa \sim intercept + Montreal/anti-TNF\ therapy + inflammation + location + age + sex + BMI$   
141  $+ medication + batch + surgical\ resection + (1|ID)$

142

143 **Supplemental Results**

144 **Table 1.** Demographic and clinical characteristics of the study population compared between the  
 145 inflamed and non-inflamed dataset.

| Variable                           | Total          | IBD               |                       | Non-IBD Controls | P-value |
|------------------------------------|----------------|-------------------|-----------------------|------------------|---------|
|                                    |                | Inflamed biopsies | Non-inflamed biopsies |                  |         |
| <b>Biopsy level</b>                | <i>n</i> = 697 | <i>n</i> = 211    | <i>n</i> = 434        | <i>n</i> = 52    |         |
| Biopsy inflammation, <i>n</i> (%)  |                |                   |                       |                  |         |
| <i>Inflamed</i>                    | 211 (30.3)     | 211 (100)         | -                     | -                |         |
| <i>Non-inflamed</i>                | 434 (62.3)     | -                 | 434 (100)             | -                |         |
| Biopsy location, <i>n</i> (%)      |                |                   |                       |                  |         |
| <i>Ileum</i>                       | 245 (35.2)     | 66 (30.8)         | 171 (39.4)            | 9 (17.3)         |         |
| <i>Colon</i>                       | 452 (64.8)     | 146 (69.2)        | 263 (60.6)            | 43 (82.7)        |         |
| Diagnosis or control, <i>n</i> (%) |                |                   |                       |                  | 0.81    |
| <i>CD</i>                          | 356 (51.1)     | 115 (54.5)        | 241 (55.5)            | -                |         |
| <i>UC</i>                          | 289 (41.5)     | 96 (45.5)         | 193 (44.5)            | -                |         |
| <i>Controls</i>                    | 52 (7.5)       | -                 | -                     | 52 (100)         |         |
| Age at biopsy (years)              | 42.9 ± 15.3    | 42.9 ± 16.1       | 42.7 ± 15.4           | 44.8 ± 10.7      | 0.65    |
| Sex, <i>n</i> (%)                  |                |                   |                       |                  | <0.01   |
| <i>Male</i>                        | 317 (45.5)     | 90 (42.7)         | 188 (43.3)            | 39 (75.0)        |         |
| <i>Female</i>                      | 380 (54.5)     | 121 (57.3)        | 246 (56.7)            | 13 (25.0)        |         |
| BMI (kg/m <sup>2</sup> )           | 25.6 ± 4.5     | 25.7 ± 4.6        | 25.7 ± 4.6            | 24.6 ± 2.5       | 0.28    |
| Current smoking, <i>n</i> (%)      |                |                   |                       |                  | <0.01   |
| <i>Yes</i>                         | 147 (21.1)     | 36 (17.1)         | 91 (21.0)             | 20 (38.5)        |         |
| <i>No</i>                          | 550 (78.9)     | 175 (82.9)        | 343 (79.0)            | 32 (61.5)        |         |

| Variable                              | IBD            | CD             | UC             | Non-IBD Controls | P-value |
|---------------------------------------|----------------|----------------|----------------|------------------|---------|
| <b>Individual (patient) level</b>     | <i>n</i> = 335 | <i>n</i> = 181 | <i>n</i> = 154 | <i>n</i> = 16    |         |
| Age (years)                           | 43.1 ± 15.4    | 41.4 ± 15.2    | 45.2 ± 15.4    | 44.4 ± 11.5      |         |
| Sex, <i>n</i> (%)                     | 335 (100)      | 181 (100)      | 154 (100)      | 16 (100)         | <0.001  |
| <i>Male</i>                           | 147 (43.9)     | 63 (34.8)      | 84 (54.54)     | 12 (75.0)        |         |
| <i>Female</i>                         | 188 (56.1)     | 118 (65.2)     | 70 (45.5)      | 4 (25.0)         |         |
| BMI (kg/m <sup>2</sup> )              | 25.9 ± 4.5     | 25.6 ± 4.7     | 26.3 ± 4.3     | 24.6 ± 2.9       |         |
| Current smoking, <i>n</i> (%)         | 335 (100)      | 181 (100)      | 154 (100)      | 16 (100)         | 0.004   |
| Yes                                   | 69 (20.6)      | 48 (26.5)      | 21 (13.6)      | 6 (37.5)         |         |
| No                                    | 266 (79.4)     | 133 (73.5)     | 133 (86.4)     | 10 (62.5)        |         |
| Montreal Age (A), <i>n</i> (%)        | 330 (98.5)     | 180 ( )        | 150 ( )        | -                |         |
| A1 (≤16 years)                        | 36 (10.9)      | 27 (15.0)      | 9 (6.0)        | -                |         |
| A2 (17–40 years)                      | 211 (63.9)     | 119 (66.1)     | 92 (61.3)      | -                |         |
| A3 (>40 years)                        | 83 (25.2)      | 34 (18.9)      | 49 (32.7)      | -                |         |
| Montreal Location (L), <i>n</i> (%)   |                | 181 (100)      | -              | -                |         |
| L1 (ileal disease)                    |                | 37 (20.4)      | -              | -                |         |
| L2 (colonic disease)                  |                | 32 (17.7)      | -              | -                |         |
| L3 (ileocolonic disease)              |                | 87 (48.0)      | -              | -                |         |
| L1 + L4                               |                | 6 (3.3)        | -              | -                |         |
| L2 + L4                               |                | 3 (1.7)        | -              | -                |         |
| L3 + L4                               |                | 16 (8.8)       | -              | -                |         |
| Montreal Behavior (B), <i>n</i> (%)   |                | 181 (100)      | -              | -                |         |
| B1 (non-stricturing, non-penetrating) |                | 75 (41.4)      | -              | -                |         |
| B2 (stricturing)                      |                | 31 (17.1)      | --             | -                |         |

|                                                       |            |            |            |   |       |
|-------------------------------------------------------|------------|------------|------------|---|-------|
| B3 (penetrating)                                      |            | 17 (93.9)  | -          | - |       |
| B1 + P (perianal disease)                             |            | 25 (13.8)  | -          | - |       |
| B2 + P (perianal disease)                             |            | 24 (13.3)  | -          | - |       |
| B3 + P (perianal disease)                             |            | 9 (5.0)    | -          | - |       |
| Montreal Extension (E), <i>n</i> (%)                  |            | -          | 135 (87.7) | - |       |
| E1 (proctitis)                                        |            | -          | 10 (7.4)   | - |       |
| E2 (left-sided colitis)                               |            | -          | 45 (33.3)  | - |       |
| E3 (pancolitis)                                       |            | -          | 80 (59.3)  | - |       |
| Montreal Severity (S), <i>n</i> (%)                   |            | -          | 112 (72.7) | - |       |
| S0 (remission)                                        |            | -          | 5 (4.5)    | - |       |
| S1 (mild)                                             |            | -          | 14 (12.5)  | - |       |
| S2 (moderate)                                         |            | -          | 63 (56.3)  | - |       |
| S3 (severe)                                           |            | -          | 30 (26.8)  | - |       |
| <b>Medication use</b>                                 |            |            |            |   |       |
| Aminosalicylates, <i>n</i> (%)                        | 140 (41.8) | 18 (9.9)   | 122 (79.2) | - | <0.01 |
| Thiopurines, <i>n</i> (%)                             | 110 (32.8) | 61 (33.7)  | 49 (31.8)  | - | 0.71  |
| Steroids, <i>n</i> (%)                                | 127 (37.9) | 63 (34.8)  | 64 (41.6)  | - | 0.20  |
| Methotrexate, <i>n</i> (%)                            | 21 (6.3)   | 16 (8.8)   | 5 (3.2)    | - | 0.04  |
| TNF- $\alpha$ -antagonists, <i>n</i> (%) <sup>†</sup> | 59 (17.6)  | 48 (26.5)  | 11 (7.1)   | - | <0.01 |
| <b>Clinical disease activity</b>                      |            |            |            |   |       |
| HBI                                                   |            | 179 (98.9) | -          | - |       |
| Remission (<5)                                        |            | 124 (69.3) | -          | - |       |
| Active disease ( $\geq$ 5)                            |            | 51 (28.5)  | -          | - |       |
| SCCAI                                                 |            | -          | 137 (90.0) | - |       |
| Remission ( $\leq$ 2)                                 |            | -          | 81 (59.1)  | - |       |



|                                                    |           |           |           |   |       |
|----------------------------------------------------|-----------|-----------|-----------|---|-------|
| Active disease (>2)                                |           | -         | 56 (40.9) | - |       |
| <b>Surgical history</b>                            |           |           |           |   |       |
| Ileocecal resection, <i>n</i> (%)                  | 72 (21.5) | 70 (38.7) | 2 (1.3)   | - | <0.01 |
| Colon resection (or partial), <i>n</i> (%)         | 72 (21.5) | 44 (24.3) | 28 (18.2) | - | 0.17  |
| Small intestinal (partial) resection, <i>n</i> (%) | 37 (11.0) | 36 (19.9) | 1 (0.6)   | - | <0.01 |

146 Data are presented as proportions *n* with corresponding percentages (%), mean ± standard deviation (SD)  
147 or as median [interquartile range, IQR] in case of continuous variables. *P* values of comparing categorical  
148 variables between groups are from two-sided  $\chi^2$  test; *P* values of comparing continuous variable between  
149 two groups are from two-sided Wilcoxon's test. *P*-values ≤ 0.05 were considered statistically significant.  
150 †Use of TNF- $\alpha$ -antagonists included use of infliximab, adalimumab, golimumab and certolizumab pegol.  
151 Abbreviations: BMI, body-mass index; CD, Crohn's disease; HBI, Harvey-Bradshaw Index; IBD,  
152 inflammatory bowel disease; TNF- $\alpha$ , tumor necrosis factor alpha; SCCAI, Simple Clinical Colitis Activity  
153 Index; UC, ulcerative colitis.

154

155 **Box 1. Individual mucosal gene–bacteria associations and their potential biological**  
156 **implications in IBD.**

157 *Mucosal bifidobacteria positively associate with aryl hydrocarbon receptor (AHR) and ABC-*  
158 *transporter (ABCC1) expression levels*

159 The positive association between *AHR* expression and bifidobacteria, although in the absence of  
160 an association between *CYP1A1* expression and bifidobacteria, could be explained by the fact that  
161 *Bifidobacterium* spp. can produce aromatic lactic acids such as indole-3-lactic acid (out of  
162 aromatic amino acids like tryptophan) via aromatic lactate dehydrogenase, which in turn activates  
163 the host aryl hydrocarbon receptor [1,2]. Activation of the aryl hydrocarbon receptor, a crucial  
164 regulator of intestinal homeostasis and immune responses, leads to a reduction of inflammation  
165 in intestinal epithelial cells [3] and confers immunoprotective effects [4].

166 Another intriguing observation is the positive association between bifidobacteria and host  
167 expression of the *ABCC1* gene. *ABCC1* is a member of the ATP-binding cassette transporters  
168 (ABC transporters, and also known as multidrug resistance-associated protein 1, MRP1) that has

169 multiple physiological functions, but it may also confer pathophysiological sequelae, especially in  
170 the context of cancer [5]. Under physiological circumstances, it detoxifies endogenously  
171 generated toxic substances (as well as xenobiotics), protects against oxidative stress, transports  
172 leukotrienes and lipids and may facilitate the cellular export and body distribution of vitamin B<sub>12</sub>  
173 [6]. Interestingly, several *Bifidobacterium* species (e.g. *B. animalis*, *B. longum* and *B. infantis*) can  
174 synthesize vitamin B<sub>12</sub>, which is subsequently absorbed in the large intestine via unknown  
175 mechanisms [7-9].

#### 176 *Mucosal bifidobacteria associate with FOSL1, a subunit of the AP-1 transcription factor*

177 Associations between mucosal *Bifidobacterium* bacteria and expression of *FOSL1* genes were  
178 amongst the top significant individual gene–bacteria interactions. Fos-related antigen 1 (FRA1),  
179 encoded by *FOSL1*, is a subunit of the activator protein 1 (AP-1) transcription factor. In the  
180 intestine, the AP-1 transcription factor is commonly activated in response to inflammatory stimuli  
181 and has been implicated in IBD [10]. More specifically, an interaction may exist between AP-1  
182 activity and the glucocorticoid receptor, which may be part of the anti-inflammatory effects of  
183 steroid treatment [11]. In steroid-resistant patients with CD, AP-1 activation was primarily  
184 observed in the nuclei of intestinal epithelial cells, whereas this activation was restricted to lamina  
185 propria macrophages in steroid-sensitive patients [10]. This suggests a differing cellular activation  
186 pattern of AP-1 activation in steroid-resistant patients where the expression of this transcription  
187 factor may interfere with the activity of the glucocorticoid response. In an experimental study in  
188 which pregnant mice were supplemented with butyrate, FOS genes, including *Fosl1*, were  
189 observed to be downregulated in the colon and associated with protection against experimentally-  
190 induced colitis [12]. Although there are currently no reports of potential immune-modulating effects  
191 for *Fosl1*, it has 85% homology with *Fosl2*, another AP-1 transcription factor. A recent study  
192 demonstrated that *Fosl2* is important in T-reg development and control of autoimmunity.  
193 Interestingly, several GWASs have reported associations of a SNP located in the promoter region  
194 of *FOSL2* with IBD [13-15], and the presence of this SNP was also shown to correlate with *FOSL2*  
195 expression in blood cells of patients with IBD [16]. In the context of T-regs, *FOSL2* also appears  
196 to be important as it is a determinant of a highly suppressive subpopulation of T-regs in humans  
197 that are particularly enriched in the lamina propria of patients with CD, supporting wound healing  
198 in the intestinal mucosa [17]. Although speculative, bifidobacteria, as well as their metabolites  
199 such as butyrate, may potentially confer immune-modulating properties via interaction with  
200 *FOSL1* expression.

#### 201 *Mucosal bifidobacteria positively associate with Krüppel-like factor 2 (KLF2) expression*

202 Krüppel-like factor 2 (encoded by *KLF2*) is a negative regulator of intestinal inflammation, and its  
203 expression is found to be reduced in patients with IBD [18]. *KLF2* also negatively regulates  
204 differentiation of adipocytes and strongly inhibits PPAR- $\gamma$  expression, which prevents  
205 differentiation of preadipocytes into adipocytes and thereby prevents adipogenesis [19]. *KLF2*  
206 also plays an important role in endothelial physiology, where it may act as a molecular switch by  
207 regulating endothelial cell function in inflammatory disease states [20]. Interestingly, *KLF2*  
208 modifies the trafficking of T-regs, as increased *KLF2* expression in T-regs promotes the induction  
209 of peripheral immunological tolerance, whereas, in the absence of its expression, T-regs are  
210 unable to effectively migrate to secondary lymphoid tissues [21]. Indeed,, it was demonstrated in  
211 mouse experiments that mice developed IBD in the presence of *KLF2*-deficient T-regs, which  
212 were unable to prevent colitis by disrupted co-trafficking of effector and regulatory T cells. In light  
213 of these considerations, mucosal bifidobacteria may confer beneficial immune-modulating  
214 properties by upregulating *KLF2* expression, thereby stimulating T-reg migration and contributing  
215 to immunological self-tolerance in the context of IBD.

#### 216 *Mucosal Anaerostipes bacteria positively associate with host SMAD4 expression*

217 *Anaerostipes*, which belong to the *Lachnospiraceae* family, are anaerobic bacteria that are well-  
218 known butyrate-producers. Butyrate serves as the primary energy source for colonic epithelial  
219 cells and is characterized by anti-inflammatory and anti-carcinogenic properties. *SMAD4* is an  
220 important intracellular effector of the TGF- $\beta$  superfamily of proteins. These proteins have  
221 important functions in alleviating intestinal inflammation and maintenance of gut mucosal  
222 homeostasis. Haploinsufficiency of *SMAD4* in mice and humans has been associated with an  
223 increased susceptibility to colonic inflammation [22]. In patients with CD, reduced epithelial protein  
224 levels of *SMAD4* were observed that was associated with disease activity, indicating defective  
225 mucosal TGF- $\beta$  signaling during active intestinal inflammation. In an experimental animal study,  
226 mice with an epithelial deletion of *Smad4* presented with macroscopic invasive adenocarcinoma  
227 of the distal colon and rectum 3 months after DSS-induced colitis [23]. Indeed, *SMAD4* mutations  
228 in humans are linked to juvenile polyposis syndrome and associated with poor disease outcome  
229 in several types of cancer [24-27]. Using RNA-seq analysis, a strong inflammatory expression  
230 profile was observed after *SMAD4* deletion, with expression of various inflammatory cytokines  
231 and chemokines, including CCL20. In addition, it was demonstrated that CCL20 could be  
232 repressed by *SMAD4* in colonic epithelial cells, proving that TGF- $\beta$  signaling could block the  
233 induction of CCL20 expression to protect against the development of colitis-associated cancer.

234 In an experimental study involving human hepatic stellate cells, butyrate was demonstrated to be  
235 protective against diet-induced nonalcoholic steatohepatitis and liver fibrosis via suppression of  
236 TGF- $\beta$  signaling pathways in which SMAD proteins are involved. Although butyrate mainly  
237 showed antifibrotic effects via reduction of non-canonical TGF- $\beta$  signaling cascades, there was  
238 also a significant increase in the expression of SMAD4 with the addition of butyrate on top of TGF-  
239  $\beta$  treatment [28]. We found *Anaerostipes* bacteria to also be strongly associated with expression  
240 of *ZNF644*, a zinc finger protein that is positively regulated by intracellular zinc concentrations.  
241 Depletion of intracellular zinc levels, or even zinc deficiency, may have destabilizing effects on  
242 SMAD proteins and thereby impair the TGF- $\beta$  signaling pathway [29].

243 *Mucosal Verrucomicrobia bacteria inversely associate with expression of the IBD susceptibility*  
244 *gene YDJC*

245 We observed significant inverse associations between Verrucomicrobia bacteria, of which  
246 *Akkermansia muciniphila* is a well-known member, and the expression of the *YDJC* gene, which  
247 encodes for the YdjC chitooligosaccharide deacetylase homolog (YdjC) protein. This gene has  
248 been identified as a shared susceptibility gene for CD, UC and psoriasis [13,30,31]. *YDJC* was  
249 originally identified as a celiac disease-associated susceptibility locus, but some SNPs were also  
250 associated with CD as well as with pediatric-onset CD [32]. YdjC catalyzes the deacetylation of  
251 acetylated carbohydrates, an important reaction in the degradation of oligosaccharides [33].  
252 *YDJC* expression has been associated with tumor progression in studies of lung cancer [34,35].  
253 The observed inverse association between *Akkermansia* and *YDJC* expression may suggest a  
254 potential protective role of *Akkermansia*, as decreased *YDJC* expression may mitigate its pro-  
255 carcinogenic effects. Despite the association between *YDJC* and the susceptibility to IBD on a  
256 genetic level, its precise functional role remains largely unknown [32].

257 *Mucosal Alistipes bacteria positively associate with MUC4 expression*

258 The bacterial genus *Alistipes*, belonging to family *Rikenellaceae* and phylum Bacteroidetes, is a  
259 recently discovered bacterial species, of which many have been isolated from the human gut  
260 microbiome. The role of *Alistipes* in health and disease is still unclear. Some evidence indicates  
261 that it may confer protective effects to the host, but other studies report pathogenic effects, e.g.  
262 in colorectal cancer development. A key factor believed to determine the relative abundance of  
263 *Alistipes* is the dysbiotic state of the gut microbiome [36]. In IBD, there is also conflicting data  
264 about the pathogenicity of *Alistipes* species. *Alistipes finegoldii* has been demonstrated to exert  
265 anti-inflammatory effects in experimental models of colitis [37]. Likewise, another study found an  
266 increased abundance of *Alistipes* in *NOD2*-knockout mice that had less severe (TNBS-induced)

267 colitis compared to wild-type mice [38]. It has also been reported that *Alistipes* abundance could  
268 increase after taking probiotic supplements, which in turn may protect against hepatocellular  
269 cancer growth in an experimental setting [39]. However, metagenomic studies have shown that  
270 *Alistipes* abundances were increased in mouse models of spontaneous CD-like ileitis terminalis  
271 as compared to wild-type mice, suggesting that *Alistipes* species may also play a pathogenic role  
272 by eliciting segmental ileitis [40,41].

273 *MUC4* encodes for mucin 4, a protein found in the glycocalyx present on the intestinal epithelium.  
274 Deletion or knockouts of *Muc4* have demonstrated protective effects in mouse models, as shown  
275 by lower levels of proinflammatory factors and resistance against DSS-induced colitis. It is still  
276 unclear how this protective mechanism of *MUC4* deletion works, but it has been hypothesized  
277 that it may trigger the concomitant upregulation of other mucin proteins (e.g. *MUC1-3*) as these  
278 genes have been observed to be highly expressed in *Muc4*-knockout mice with DSS-induced  
279 colitis [42,43]. Based on this, we speculate that the positive association between *Alistipes*  
280 abundance and *MUC4* expression may imply a potential pathogenic role of *Alistipes* in the context  
281 of IBD-associated dysbiosis. However, in our data, we did not observe a significant interaction via  
282 dysbiotic status between *Alistipes* abundance and *MUC4* expression.

### 283 *Mucosal Oscillibacter* bacteria positively associate with OSM expression

284 *Oscillibacter*-like bacteria, which include *Oscillibacter* and *Oscillospira*, are commonly detected in  
285 human gut microbial communities, although their exact physiological role is not fully understood.  
286 Previously, it was reported that *Oscillibacter* may be a potentially important bacterium in mediating  
287 high fat diet-induced intestinal dysfunction, which was supported by a negative association  
288 between *Oscillibacter* and intestinal barrier function parameters [44]. Similarly, the abundance of  
289 *Oscillibacter* has been reported as a key bacterial group associated with colitis development in  
290 DSS-induced colitis in mice and with prenatal stress in rodents [45,46]. However, a recent study  
291 linking gut microbiota profiles to sulfur metabolism in patients with CD demonstrated that  
292 *Oscillibacter* abundance was enriched in patients with inactive compared to active disease but  
293 diminished in patients with IBD compared to controls [47,48]. Thus, similar to *Bacteroides* and  
294 *Alistipes*, the exact functional role of *Oscillibacter* in the context of IBD remains elusive, but it will  
295 likely depend on gut microbial dysbiosis and the intestinal (inflammatory) environment. The *OSM*  
296 gene encodes for the oncostatin M protein, a well-known inflammatory mediator in IBD that drives  
297 intestinal inflammation, mainly *via* activation of JAK-STAT and PI3K-Akt pathways [49]. Besides  
298 induction of other inflammatory events, it primarily triggers the production of various cytokines,  
299 chemokines and adhesion molecules that contribute to intestinal inflammation [50]. In addition,

300 OSM is a marker for non-responsiveness to TNF- $\alpha$ -antagonists in patients with IBD [51].  
301 Considering these findings, the positive association between *OSM* expression and *Oscillibacter*  
302 abundance we observe supports a potentially pathogenic role for this bacterial species in IBD.

303

304 *Mucosal Blautia bacteria associate with host ST13 expression levels*

305 Hsc70-interacting protein, encoded by the *ST13* gene, mediates the assembly of the human  
306 glucocorticoid receptor, which requires involvement of intracellular chaperone proteins such as  
307 heat shock proteins HSP70 and HSP90 [52]. Reduced expression of *ST13* has been observed in  
308 patients with colorectal cancer, suggesting that *ST13* may constitute a candidate tumor-  
309 suppressor gene [53,54]. The positive association we observe between mucosal *Blautia*  
310 abundance and *ST13* gene expression may therefore point to a protective anti-carcinogenic role  
311 for *Blautia* in the intestines.

## 312 **Downsampling analysis to confirm the sample size effect**

313 To assess the sample size effect on results, we have performed the following assessments:

### 314 1. *Downsampling non-inflamed tissue samples to match the number of inflamed samples*

315 First, we down-sampled the number of non-inflamed biopsies (n=434) 10 times to match the  
316 number inflamed biopsies (n=211), and then repeated the sparse-CCA analysis and individual  
317 gene-bacteria associations tests with the same models and the same *P* value correction method  
318 (BH). In general, the gene modules (adjusted  $P < 0.05$ ) from sparse-CCA showed very good  
319 overlap rates varying from 58-71%, albeit the bacterial modules showed a bit weaker replication  
320 with rates varying from 38-69%. Moreover, the number of significant down-sampled individual  
321 gene-bacteria results (adjusted  $P < 0.05$ ) were lower, which were 16, 13, 9, 7, 0, 2, 15, 26, 0 and  
322 33, but with on average a 75.86% overlap. All analyses here indicate that albeit the larger sample  
323 size increases the chance to identify more significant signals, it does not dramatically influence  
324 the main gene-bacteria association patterns in non-inflamed biopsies.

### 325 2. *Downsampling samples of patients without fibrostenotic CD to match fibrostenotic CD*

326 Subsequently, we down-sampled the amount of samples from patients without fibrostenotic  
327 CD (n=244) to match the number of samples from patients with fibrostenotic CD (n=107) for  
328 10 times and repeated the network- and comparative analysis using the same methods. Here,

329 we identified the same four distinct microbiota associated gene clusters between the two  
330 groups (represented by *Lachnospirillum*, *Coprococcus*, *Erysipelotrichaceae* and  
331 *Flavonifractor*). These four clusters showed significance in 8 out of 10 times downsampling  
332 rounds, indicating the patterns were quite stable. The *Faecalibacterium*-associated gene  
333 cluster was significant in 5 out of 10 times downsampling rounds, presumably because of a  
334 sample-size effect.

335 3. *Downsampling samples without TNF- $\alpha$ -antagonists usage to match samples under the usage*  
336 *of TNF- $\alpha$ -antagonists*

337 We down-sampled the samples from patients without TNF- $\alpha$ -antagonists usage (n=583) to match  
338 the number of samples from patients with TNF- $\alpha$ -antagonists usage (n=113) for 10 times and  
339 repeated the network and comparison analysis using the same methods. In general, only the  
340 *Ruminococcaceae*-UCG\_002 associated gene cluster was still present across downsampling  
341 tests, which showed significance in 7 out of 10 times downsampling rounds. The *Faecalibacterium*  
342 and *Ruminococcaceae*\_UCG-005 associated gene clusters were largely influenced by sample  
343 size.

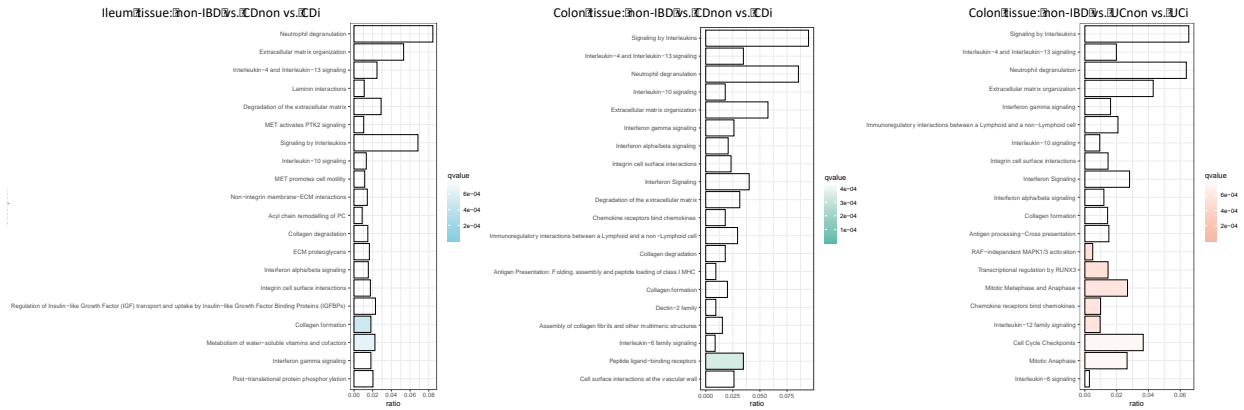

344

345 **Supplementary Fig. S1. Analysis of pathways associated with each comparative gene**

346 **expression analysis.** The main pathways associated with inflamed ileal tissue in patients with

347 CD (blue) include neutrophil degranulation, extracellular matrix (ECM) organization and IL-4/IL-

348 13-signaling. Similar pathways were overexpressed in inflamed colonic tissue from patients with

349 CD (green), but with a more prominent contribution from interleukin signaling pathways.

350 Interleukin signaling pathways were also dominantly expressed in inflamed colonic tissue from

351 patients with UC (orange), with other pathways expressed including neutrophil degranulation,

352 ECM pathways, interferon gamma signaling and immunoregulatory interactions between

353 lymphoid and non-lymphoid cells. Pathways were annotated using the Reactome pathway

354 database. Abbreviations: CDi, inflamed tissue from patients with Crohn's disease; CD-non, non-

355 inflamed tissue from patients with Crohn's disease; UCi, inflamed tissue from patients with

356 ulcerative colitis; UC-non, non-inflamed tissue from patients with ulcerative colitis.

357



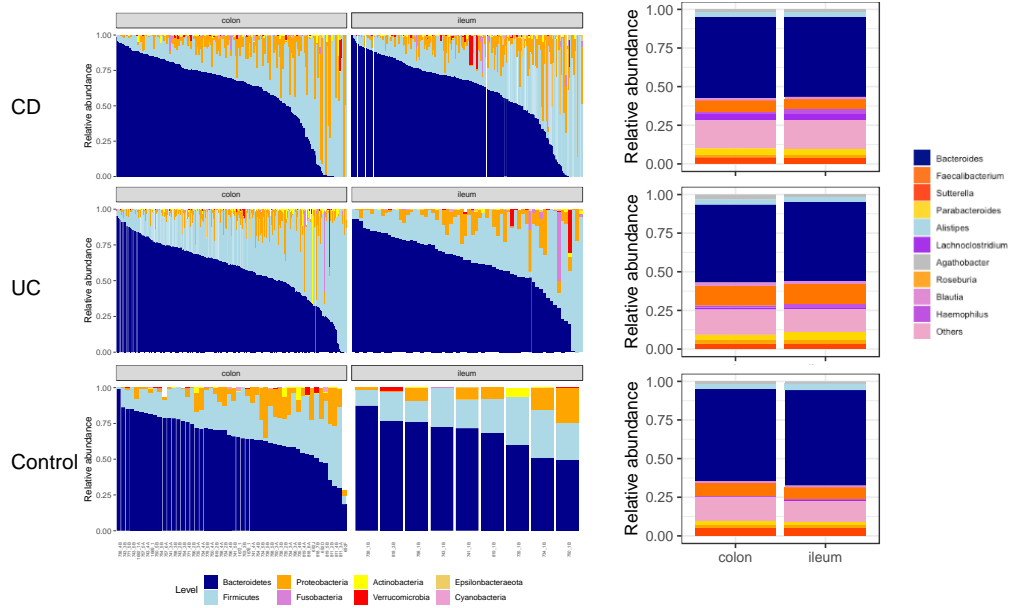

358

359 **Supplementary Fig. S2. Mucosal 16S rRNA gene sequencing characterization**  
 360 **demonstrates distinct compositional differences in relative abundances on (A) bacterial**  
 361 **phylum level and (B) bacterial genus level.** Abbreviations: CD, Crohn's disease; UC, ulcerative  
 362 colitis.

363

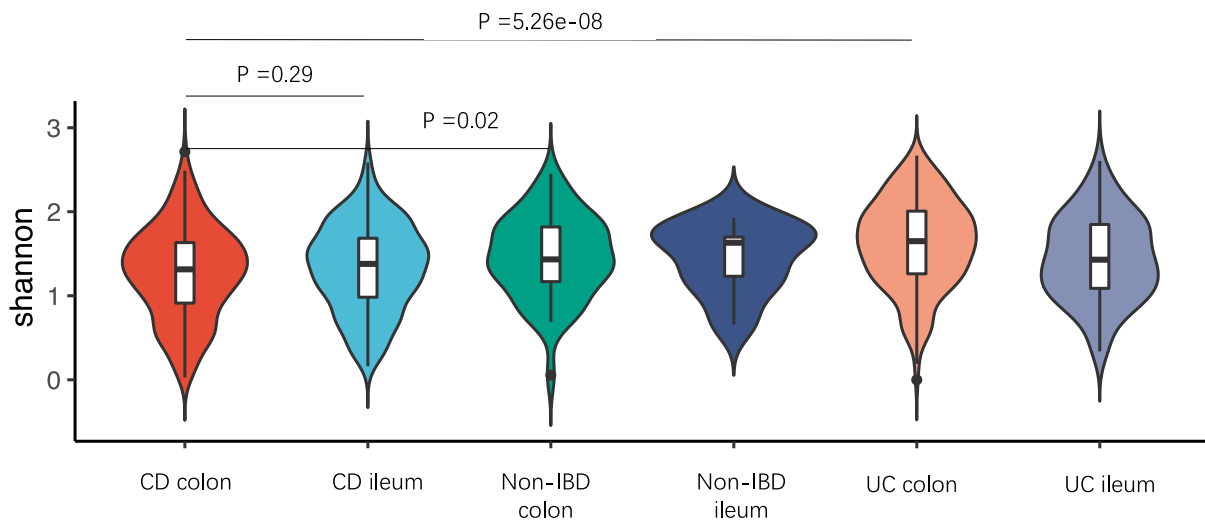

364

365 **Supplementary Fig. S3. Microbial alpha-diversity (Shannon index) is significantly lower in**  
 366 **colonic biopsies from patients with CD compared to colonic biopsies derived from patients**

367 **with UC or controls.** This indicates that this difference is not solely attributable to ileal biopsies  
368 from patients with CD.

369

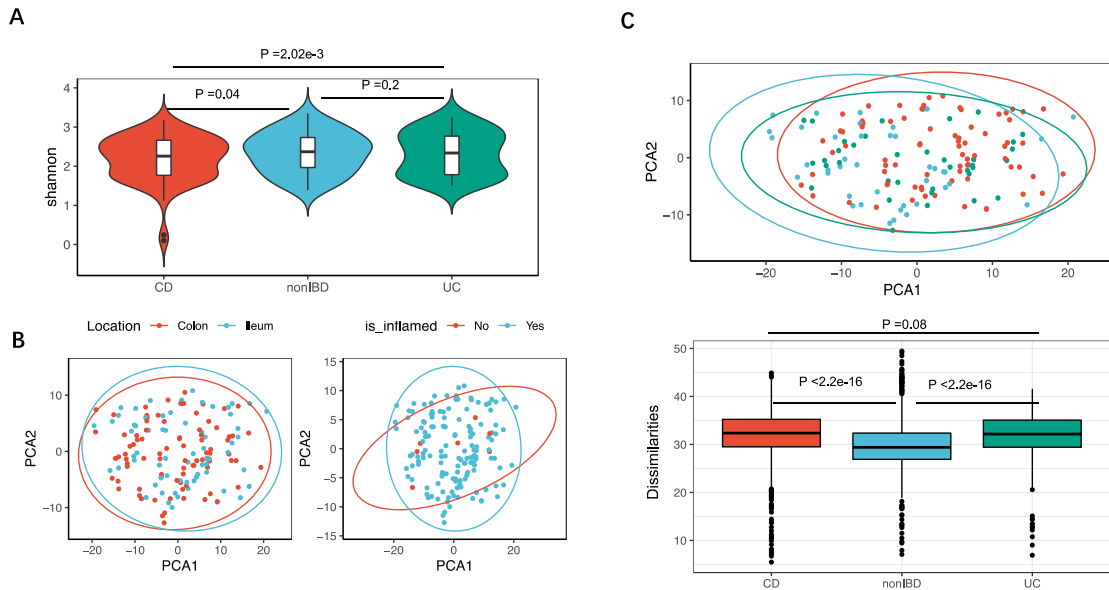

370

371 **Supplementary Fig. S4. Replication of overall mucosal microbiota characterization in**  
372 **patients with IBD and non-IBD controls.** Replication was performed in data derived from the  
373 HMP2 cohort study. **a**, Microbial alpha-diversity (Shannon index) was lowest in patients with CD  
374 (n=85) compared to patients with UC (n=46) and non-IBD controls (n=45). **b**, PCA plots based  
375 on Aitchison's distances and stratified by tissue location and inflammatory status (colors as in  
376 **a**). **c**, PCA plot showing microbial dissimilarity (Aitchison's distances) in CD, UC and non-IBD  
377 controls. **d**, Microbial dissimilarity is highest in samples from patients with CD, followed by  
378 patients with UC and non-IBD controls. CD, Crohn's disease; PCA, principal component  
379 analysis; UC, ulcerative colitis.

380

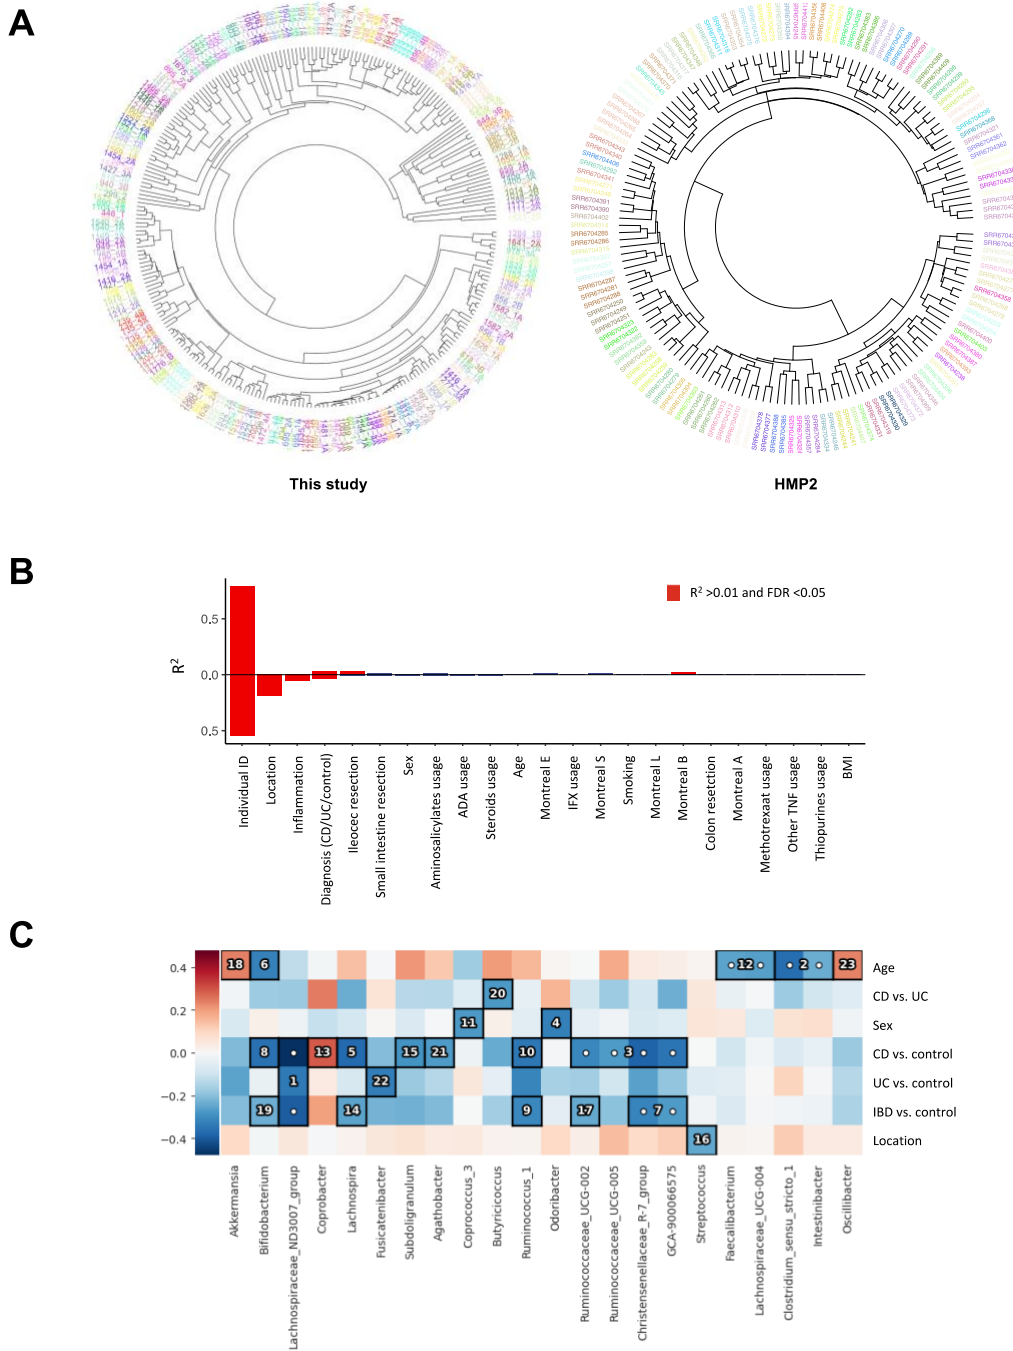

381  
 382 **Supplementary Fig. S5. Composition of the mucosal microbiota is highly personalized**  
 383 **and influenced by disease parameters and clinical factors in patients with IBD and**  
 384 **controls, using data derived from the HMP2 cohort [8]. (A) Hierarchical clustering analysis**  
 385 **demonstrating that tissue samples from the same individual (paired samples) clearly cluster**  
 386 **together (colors indicate unique individuals) in the HMP2 cohort. (B) Adonis analysis of**

387 microbial community (genus level) and host gene expressions showed higher inter-individual  
388 variability in gut microbiota ( $R^2 = 0.79$ , adjusted  $P < 0.05$ ). Neither the inflammation status nor  
389 tissue location explained  $>1\%$  of the microbial variation while these two factors explained 6%  
390 and 19% variation in intestinal gene expressions, respectively. Red color indicates those factors  
391 significantly explain  $>1\%$  variation (adjusted  $P < 0.05$ ). **(C)** Hierarchical analysis performed using  
392 an end-to-end statistical algorithm (HALLA) showing the main phenotypic factors that correlate  
393 with intestinal mucosal microbiota composition in the HMP2 cohort. Heatmap color palette  
394 indicates normalized mutual information. Numbers and dots in cells identify the significant pairs  
395 of features (phenotypic factors vs. bacterial taxa) in patients with IBD and controls.  
396 Abbreviations: BMI, body-mass index; CD, Crohn's disease; UC, ulcerative colitis.

397

**A**

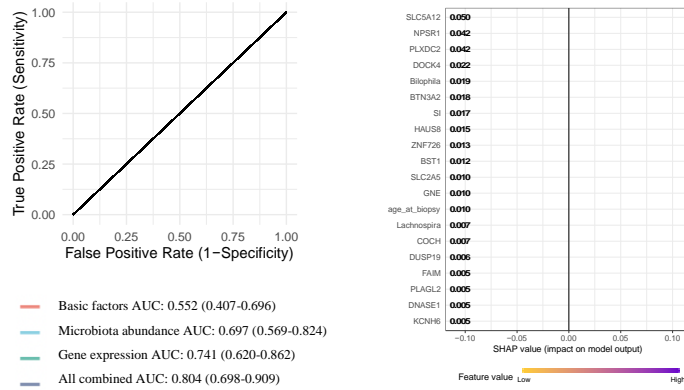

**B**

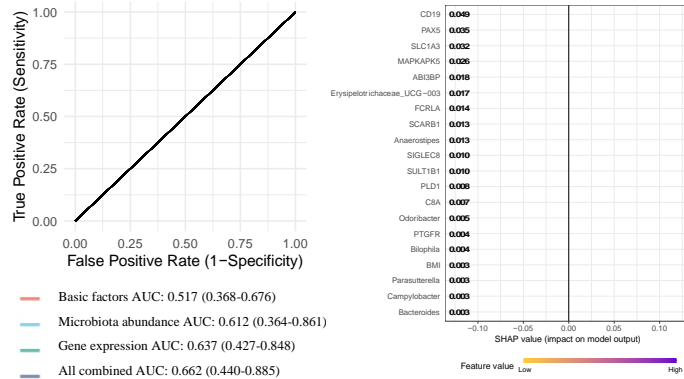

**C**

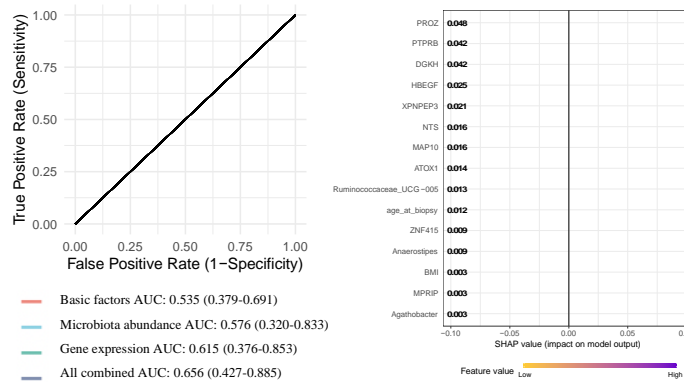

398

399 **Supplementary Fig. S6. Prediction of IBD subtypes.** Four different predictor combinations  
 400 were used to predict CD vs. UC, Montreal B1 vs. B2 and Montreal E2 vs. E3 using eXtreme  
 401 Gradient Boosting (xgboost) model. The clinical outcomes were selected based on the sample  
 402 size. The predictors included age, sex, BMI, host gene expression and intestinal microbiota.  
 403 SHapley Additive exPlanations (SHAP) values were calculated to quantify each feature

404 importance. A) right panel: models in discrimination between CD and UC, left panel: top 20 SHAP  
405 values, B) right panel: models in discrimination between Montreal B1 and B2, left panel: top 20  
406 SHAP values, C) right panel: models in discrimination between Montreal E2 and E3, left panel:  
407 top 15 SHAP values. Model performance were only showed in test data set (20% samples).

408

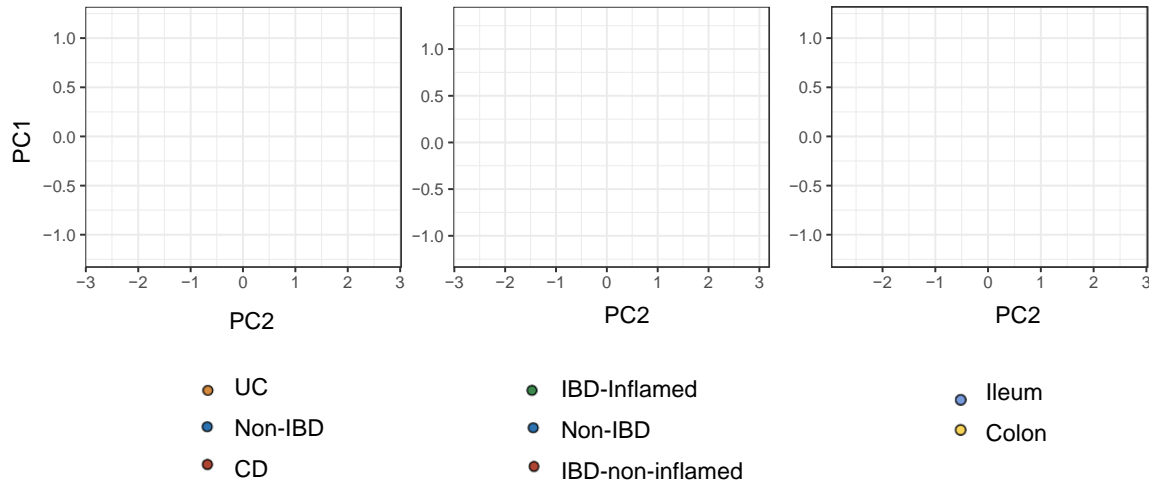

409

410 **Supplementary Fig. S7. Principal component analysis (PCA) plots demonstrating variation**  
411 **in cell type–enrichment labeled by diagnosis, biopsy inflammatory status and intestinal**  
412 **location.** Each dot represents one tissue sample. Left: Patients with IBD, both CD and UC, show  
413 significantly different intestinal cell type composition compared to controls. Middle: Tissue  
414 inflammatory status induces shifts in cell type composition, showing differences between non-  
415 inflamed IBD tissue vs. control tissue and inflamed IBD tissue vs. control tissue. Right: Tissue  
416 location (ileum vs. colon) also demonstrates distinct variation in cell type composition.

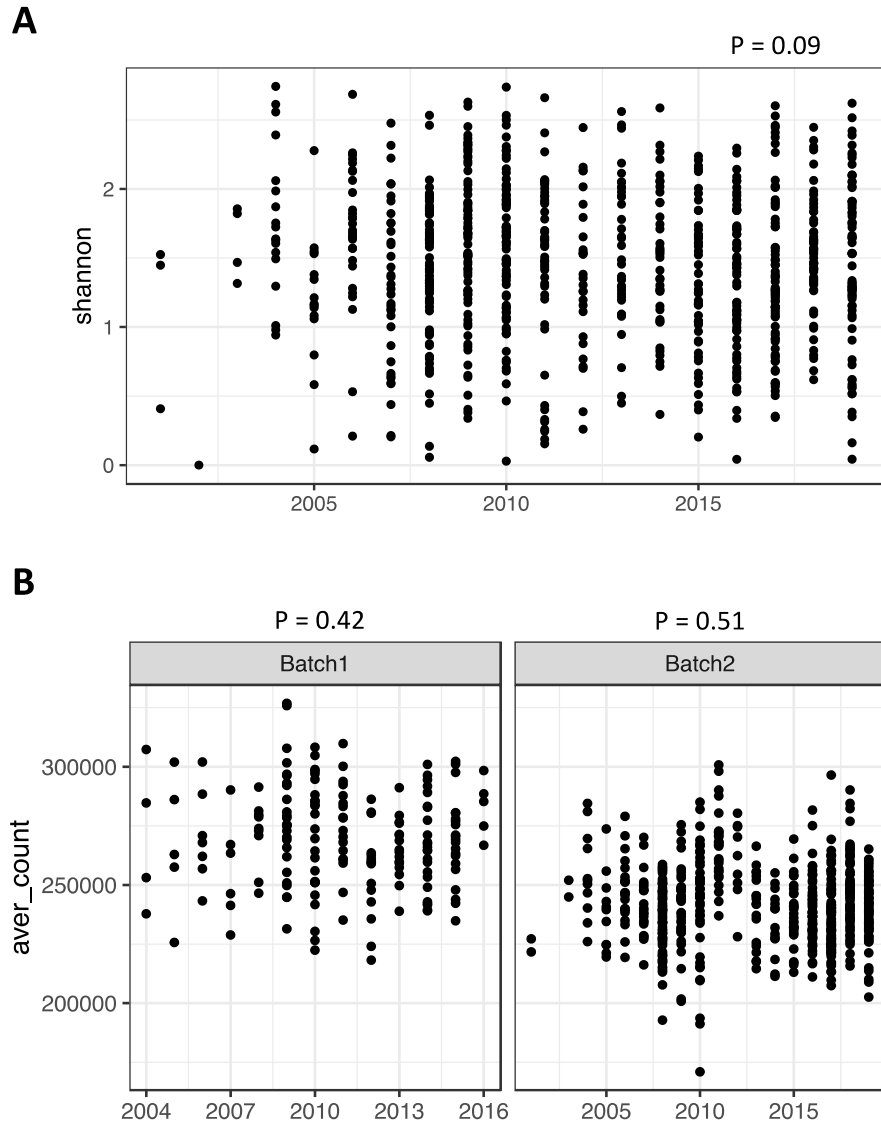

417

418 **Supplementary Fig. S8. Sample storage time and sequencing quality check.** (A) The  
 419 correlation between sample collection year and Shannon diversity detected by mucosal 16S  
 420 sequencing (Speaman correlation test,  $P=0.09$ ). (B) The correlation between sample collection  
 421 year and average gene count detected by mucosal bulk RNA sequencing in each batch  
 422 (Spearmen correlation test,  $P=0.42$  in batch 1 and  $P=0.51$  in batch 2).

423

424

425 **Supplemental References to Box 1**

- 426 1. Wong CB, Tanaka A, Kuhara T, et al. Potential effects of Indole-3-Lactic Acid, a Metabolite of  
427 Human Bifidobacteria, on NGF-induced Neurite Outgrowth in PC12 Cells. *Microorganisms*  
428 2020;8(3):398. doi: 10.3390/microorganisms8030398.
- 429 2. Laursen MF, Sakanaka M, von Burg N, et al. Bifidobacterium species associated with  
430 breastfeeding produce aromatic lactic acids in the infant gut. *Nat Microbiol* 2021;6(11):1367-1382.  
431 doi: 10.1038/s41564-021-00970-4.
- 432 3. Ehrlich AM, Pacheco AR, Henrick BM, et al. Indole-3-lactic acid associated with  
433 Bifidobacterium-dominated microbiota significantly decreases inflammation in intestinal epithelial  
434 cells. *BMC Microbiol* 2020;20(1):357. doi: 10.1186/s12866-020-02023-y.
- 435 4. Henrick BM, Rodriguez L, Lakshmikanth T, et al. Bifidobacteria-mediated immune system  
436 imprinting early in life. *Cell* 2021;184(15):3884-3898.e11. doi: 10.1016/j.cell.2021.05.030.
- 437 5. Bakos E, Homolya L. Portrait of multifaceted transporter, the multidrug resistance-associated  
438 protein 1 (MRP1/ABCC1). *Pflugers Arch* 2007;453(5):621-41. doi: 10.1007/s00424-006-0160-8.
- 439 6. He SM, Li R, Kanwar JR, et al. Structural and functional properties of human multidrug  
440 resistance protein 1 (MRP1/ABCC1). *Curr Med Chem* 2011;18(3):439-81. doi:  
441 10.2174/092986711794839197.
- 442 7. Yoshii K, Hosomi K, Sawane K, et al. Metabolism of Dietary and Microbial Vitamin B Family in  
443 the Regulation of Host Immunity. *Front Nutr* 2019;6:48. doi: 10.3389/fnut.2019.00048.
- 444 8. Beedholm-Ebsen R, van de Wetering K, Hardlei T, et al. Identification of multidrug resistance  
445 protein 1 (MRP1/ABCC1) as a molecular gate for cellular export of cobalamin. *Blood*  
446 2010;115(8):1632-9. doi: 10.1182/blood-2009-07-232587.
- 447 9. Lee JH, O'Sullivan DJ. Genomic insights into bifidobacteria. *Microbiol Mol Biol Rev*  
448 2010;74(3):378-416. doi: 10.1128/MMBR.00004-10.
- 449 10. Bantel H, Schmitz ML, Raible A, et al. Critical role of NF-kappaB and stress-activated protein  
450 kinases in steroid unresponsiveness. *FASEB J* 2002;16(13):1832-4. doi: 10.1096/fj.02-0223fje.
- 451 11. Karin M, Chang L. AP-1--glucocorticoid receptor crosstalk taken to a higher level. *J Endocrinol*  
452 2001;169(3):447-51. doi: 10.1677/joe.0.1690447.



- 453 12. Barbian ME, Owens JA, Naudin CR, et al. Butyrate supplementation to pregnant mice elicits  
454 cytoprotection against colonic injury in the offspring. *Pediatr Res* 2021; doi: 10.1038/s41390-021-  
455 01767-1.
- 456 13. Jostins L, Ripke S, Weersma RK, et al. Host-microbe interactions have shaped the genetic  
457 architecture of inflammatory bowel disease. *Nature* 2012;491(7422):119-24. doi:  
458 10.1038/nature11582.
- 459 14. Liu JZ, van Sommeren S, Huang H, et al. Association analyses identify 38 susceptibility loci  
460 for inflammatory bowel disease and highlight shared genetic risk across populations. *Nat Genet*  
461 2015;47(9):979-986. doi: 10.1038/ng.3359.
- 462 15. Ye BD, McGovern DPB. Genetic variation in IBD: progress, clues to pathogenesis and  
463 possible clinical utility. *Exp Rev Clin Immunol* 2016;12(10):1091-107. doi:  
464 10.1080/1744666X.2016.1184972.
- 465 16. Di Narzo AF, Peters LA, Argmann C, et al. Blood and Intestine eQTLs from an Anti-TNF-  
466 Resistant Crohn's Disease Cohort Inform IBD Genetic Association Loci. *Clin Transl Gastroenterol*  
467 2016;7(6):e177. doi: 10.1038/ctg.2016.34.
- 468 17. Povoleri GAM, Nova-Lamperti E, Scottà C, et al. Human retinoic acid-regulated CD161+  
469 regulatory T cells support wound repair in intestinal mucosa. *Nat Immunol* 2018;19(12):1403-  
470 1414. doi: 10.1038/s41590-018-0230-z.
- 471 18. Wang ZL, Wang YD, Wang K, et al. KLF2 participates in the development of ulcerative colitis  
472 through inhibiting inflammation via regulating cytokines. *Eur Rev Med Pharmacol Sci*  
473 2018;2(15):4941-4948. doi: 10.26355/eurrev\_201808\_15633.
- 474 19. Banerjee SS, Feinberg MW, Watanabe M, et al. The Krüppel-like factor KLF2 inhibits  
475 peroxisome proliferator-activated receptor-gamma expression and adipogenesis. *J Biol Chem*  
476 2003;278(4):2581-4. doi: 10.1074/jbc.M210859200.
- 477 20. Banerjee SS, Lin Z, Atkins GB, et al. KLF2 Is a novel transcriptional regulator of endothelial  
478 proinflammatory activation. *J Exp Med* 2004;199(10):1305-15. doi: 10.1084/jem.20031132.
- 479 21. Pabbisetty SK, Rabacal W, Volanakis EJ, et al. Peripheral tolerance can be modified by  
480 altering KLF2-regulated Treg migration. *Proc Natl Acad Sci U S A* 2016;113(32):E4662-70. doi:  
481 10.1073/pnas.1605849113.
- 482 22. Szigeti R, Pangas SA, Nagy-Szakal D, et al. SMAD4 haploinsufficiency associates with  
483 augmented colonic inflammation in select humans and mice. *Ann Clin Lab Sci* 2012;42(4):401-8.

- 484 23. Means AL, Freeman TJ, Zhu J, et al. Epithelial Smad4 Deletion Up-Regulates Inflammation  
485 and Promotes Inflammation-Associated Cancer. *Cell Mol Gastroenterol Hepatol* 2018;6(3):257-  
486 276. doi: 10.1016/j.jcmgh.2018.05.006.
- 487 24. Wang Y, Xue Q, Zheng Q, et al. SMAD4 mutation correlates with poor prognosis in non-small  
488 cell lung cancer. *Lab Invest* 2021;101(4):463-476. doi: 10.1038/s41374-020-00517-x.
- 489 25. Mizuno T, Cloyd JM, Vicente D, et al. SMAD4 gene mutation predicts poor prognosis in  
490 patients undergoing resection for colorectal liver metastases. *Eur J Surg Oncol* 2018;44(5):684-  
491 692. doi: 10.1016/j.ejso.2018.02.247.
- 492 26. Miyaki M, Iijima T, Konishi M, et al. Higher frequency of Smad4 gene mutation in human  
493 colorectal cancer with distant metastasis. *Oncogene* 1999;18(20):3098-103. doi:  
494 10.1038/sj.onc.1202642.
- 495 27. Lin LH, Chang KW, Cheng HW, et al. SMAD4 Somatic Mutations in Head and Neck  
496 Carcinoma Are Associated With Tumor Progression. *Front Oncol* 2019;9:1379. doi:  
497 10.3389/fonc.2019.01379.
- 498 28. Gart E, van Duyvenvoorde W, Toet K, et al. Butyrate Protects against Diet-Induced NASH  
499 and Liver Fibrosis and Suppresses Specific Non-Canonical TGF- $\beta$  Signaling Pathways in Human  
500 Hepatic Stellate Cells. *Biomedicines* 2021;9(12):1954. doi: 10.3390/biomedicines9121954.
- 501 29. Dong S, Tian Q, Zhu T, et al. SLC39A5 dysfunction impairs extracellular matrix synthesis in  
502 high myopia pathogenesis. *J Cell Mol Med* 2021;25(17):8432-8441. doi: 10.1111/jcmm.16803.
- 503 30. Ellinghaus D, Ellinghaus E, Nair RP, et al. Combined analysis of genome-wide association  
504 studies for Crohn disease and psoriasis identifies seven shared susceptibility loci. *Am J Human*  
505 *Genet* 2012;90(4):636-47. doi: 10.1016/j.ajhg.2012.02.020.
- 506 31. Ye BD, Choi H, Hong M, et al. Identification of Ten Additional Susceptibility Loci for Ulcerative  
507 Colitis Through ImmunoChip Analysis in Koreans. *Inflamm Bowel Dis* 2016;22(1):13-9. doi:  
508 10.1097/MIB.0000000000000584.
- 509 32. Parmar AS, Lappalainen M, Paavola-Sakki P, et al. Association of celiac disease genes with  
510 inflammatory bowel disease in Finnish and Swedish patients. *Genes Immun* 2012;13(6):474-80.  
511 doi: 10.1038/gene.2012.21.
- 512 33. Verma SC, Mahadevan S. The chbG gene of the chitobiose (chb) operon of Escherichia coli  
513 encodes a chitooligosaccharide deacetylase. *J Bacteriol* 2012;194(18):4959-71. doi:  
514 10.1128/JB.00533-12.

- 515 34. Kim EJ, Park MK, Kang GJ, et al. YDJC Induces Epithelial-Mesenchymal Transition via  
516 Escaping from Interaction with CDC16 through Ubiquitination of PP2A. *J Oncol*  
517 2019;2019:3542537. doi: 10.1155/2019/3542537.
- 518 35. Kim EJ, Park MK, Byun HJ, et al. YdjC chitooligosaccharide deacetylase homolog induces  
519 keratin reorganization in lung cancer cells: involvement of interactions between YDJC and  
520 CDC16. *Oncotarget* 2018;9(33):22915-22928. doi: 10.18632/oncotarget.25145.
- 521 36. Parker BJ, Wearsch PA, Veloo ACM, et al. The Genus *Alistipes*: Gut Bacteria With Emerging  
522 Implications to Inflammation, Cancer, and Mental Health. *Front Immunol* 2020;11:906. doi:  
523 10.3389/fimmu.2020.00906.
- 524 37. Dziarski R, Park SY, Kashyap DR, et al. Pglyrp-Regulated Gut Microflora *Prevotella falsenii*,  
525 *Parabacteroides distasonis* and *Bacteroides eggerthii* Enhance and *Alistipes finegoldii* Attenuates  
526 Colitis in Mice. *PLoS One* 2016;11(1):e0146162. doi: 10.1371/journal.pone.0146162.
- 527 38. Butera A, Di Paola M, Pavarini L, et al. Nod2 Deficiency in mice is Associated with Microbiota  
528 Variation Favouring the Expansion of mucosal CD4<sup>+</sup> LAP<sup>+</sup> Regulatory Cells. *Sci Rep*  
529 2018;8(1):14241. doi: 10.1038/s41598-018-32583-z.
- 530 39. Li J, Sung CY, Lee N, et al. Probiotics modulated gut microbiota suppresses hepatocellular  
531 carcinoma growth in mice. *Proc Natl Acad Sci U S A* 2016;113(9):E1306-15. doi:  
532 10.1073/pnas.1518189113.
- 533 40. Rodriguez-Palacios A, Kodani T, Kaydo L, et al. Stereomicroscopic 3D-pattern profiling of  
534 murine and human intestinal inflammation reveals unique structural phenotypes. *Nat Commun*  
535 2015;6:7577. doi: 10.1038/ncomms8577.
- 536 41. Rodriguez-Palacios A, Harding A, Menghini P, et al. The Artificial Sweetener Splenda  
537 Promotes Gut Proteobacteria, Dysbiosis, and Myeloperoxidase Reactivity in Crohn's Disease-  
538 Like Ileitis. *Inflamm Bowel Dis* 2018;24(5):1005-1020. doi: 10.1093/ibd/izy060.
- 539 42. Grondin JA, Kwon YH, Far PM, et al. Mucins in Intestinal Mucosal Defense and Inflammation:  
540 Learning From Clinical and Experimental Studies. *Front Immunol* 2020;11:2054. doi:  
541 10.3389/fimmu.2020.02054.
- 542 43. Das S, Rachagani S, Sheinin Y, et al. Mice deficient in Muc4 are resistant to experimental  
543 colitis and colitis-associated colorectal cancer. *Oncogene* 2016;35(20):2645-54. doi:  
544 10.1038/onc.2015.327.

545 44. Lam YY, Ha CWY, Campbell CR, et al. Increased gut permeability and microbiota change  
546 associate with mesenteric fat accumulation and metabolic dysfunction in diet-induced obese mice.  
547 *PLoS One* 2012;7(3):e34233. doi: 10.1371/journal.pone.0034233.

548 45. Peng Y, Yan Y, Wan P, et al. Gut microbiota modulation and anti-inflammatory properties of  
549 anthocyanins from the fruit of *Lycium ruthenicum* Murray in dextran sodium sulfate-induced colitis  
550 in mice. *Free Radic Biol Med* 2019;136:96-108. doi: 10.1016/j.freeradbiomed.2019.04.005.

551 46. Golubeva AV, Crampton S, Desbonnet L, et al. Prenatal stress-induced alterations in major  
552 physiological systems correlate with gut microbiota composition in adulthood.  
553 *Psychoneuroendocrinology* 2015;60:58-74. doi: 10.1016/j.psyneuen.2015.06.002.

554 47. Metwaly A, Dunkel A, Waldschmitt N, et al. Integrated microbiota and metabolite profiles link  
555 Crohn's disease to sulfur metabolism. *Nat Commun* 2020;11(1):4322. doi: 10.1038/s41467-020-  
556 17956-1.

557 48. Ryan FJ, Ahern AM, Fitzgerald RS, et al. Colonic microbiota is associated with inflammation  
558 and host epigenomic alterations in inflammatory bowel disease. *Nat Commun* 2020;11(1):1512.  
559 doi: 10.1038/s41467-020-15342-5.

560 49. Chollangi S, Mather T, Rodgers KK, et al. A unique loop structure in oncostatin M determines  
561 binding affinity toward oncostatin M receptor and leukemia inhibitory factor receptor. *J Biol Chem*  
562 2012;287(39):32848-59. doi: 10.1074/jbc.M112.387324.

563 50. Verstockt S, Verstockt B, Machiels K, et al. Oncostatin M Is a Biomarker of Diagnosis, Worse  
564 Disease Prognosis, and Therapeutic Nonresponse in Inflammatory Bowel Disease. *Inflamm*  
565 *Bowel Dis* 2021;27(10):1564-1575. doi: 10.1093/ibd/izab032.

566 51. West NR, Hegazy AN, Owens BMJ, et al. Oncostatin M drives intestinal inflammation and  
567 predicts response to tumor necrosis factor-neutralizing therapy in patients with inflammatory  
568 bowel disease. *Nat Med* 2017;23(5):579-589. doi: 10.1038/nm.4307.

569 52. Place SP. Single-point mutation in a conserved TPR domain of Hip disrupts enhancement of  
570 glucocorticoid receptor signaling. *Cell Stress Chaperones* 2011;16(4):469-74. doi:  
571 10.1007/s12192-010-0254-2.

572 53. Bai R, Shi Z, Zhang JW, et al. ST13, a proliferation regulator, inhibits growth and migration of  
573 colorectal cancer cell lines. *J Zhejiang Univ Sci B* 2012;13(11):884-893. doi:  
574 10.1631/jzus.B1200037.

575 54. Wang LB, Zheng S, Zhang SZ, et al. Expression of ST13 in colorectal cancer and adjacent  
576 normal tissues. *World J Gastroenterol* 2005;11(3):336-9. doi: 10.3748/wjg.v11.i3.336.

577
